# Supplementary material for: A Novel Pyroptotic and Inflammatory Gene Signature Predicts the Prognosis of Cutaneous Melanoma and the Effect of Anticancer Therapies
Source: Front Med (Lausanne). 2022 Apr 15;9:841568. doi: 10.3389/fmed.2022.841568 (PMC9053829; doi:10.3389/fmed.2022.841568)
Supplement: Supplementary file 1 [file Table_1.XLSX]

## Sheet: Sheet1
Table 1 Clinicopathological characteristics of SKCM patients
Characteristics		TCGA cohort (N = 471)
N (%)
	Age
	≤60 years		257 (54.7)
	> 60 years		214 (45.3)
	Gender
	Male		297 (61.9)
	Female		183 (38.1)
	unknown		9 （1.9）
	stage
	I-II		231(49.1)
	III		171(36.3)
	IV		23 (4.8)
	unknown		52 (10.9)
	T
	T1-2		121 (32.7)
	T3-4		249 (67.3)
	N
	N0		236 (65.0)
	N1		75 (20.7)
	N2		52 (14.3)
	N3		55 （11.7）
	M
	M0		424 (94.4)
	M1		25 (5.6)
