# Supplementary material for: A Novel Pyroptotic and Inflammatory Gene Signature Predicts the Prognosis of Cutaneous Melanoma and the Effect of Anticancer Therapies
Source: Front Med (Lausanne). 2022 Apr 15;9:841568. doi: 10.3389/fmed.2022.841568 (PMC9053829; doi:10.3389/fmed.2022.841568)
Supplement: Supplementary file 3 [file Table_3.XLSX]

## Sheet: Sheet1
gene	Primer	Basesequence (5` to 3`)	Length	Tm	Location
TLR1	Forward Primer	CCACGTTCCTAAAGACCTATCCC	23	61.7	111-133
	Reverse Primer	CCAAGTGCTTGAGGTTCACAG	21	61.1	358-338
CCL8	Forward Primer	TGGAGAGCTACACAAGAATCACC	23	61.6	143-165
	Reverse Primer	TGGTCCAGATGCTTCATGGAA	21	61.1	275-255
EMP3	Forward Primer	CCTGAATCTCTGGTACGACTGC	22	62.1	108-129
	Reverse Primer	GCCATTCTCGCTGACATTACTG	22	61.3	183-162
IFNGR2	Forward Primer	GCAGGCTTCCCAATGGATTTC	21	61.6	307-327
	Reverse Primer	CCCGACAGTCACATTCCGATA	21	61.3	423-403
CCL25	Forward Primer	GGCCCTCATGCTGTAAAGAAG	21	60.7	328-348
	Reverse Primer	TGCTGATGGGATTGCTAAACTT	22	60	403-382
IL15	Forward Primer	TTGGGAACCATAGATTTGTGCAG	23	60.8	7-29
	Reverse Primer	AGAGAAAGCACTTCATTGCTGTT	23	60.7	196-174
RTP4	Forward Primer	CCATGAGGATTCTGAGCAACC	21	60.4	332-352
	Reverse Primer	CTTCCAGGATTACTGGCATTTCT	23	60	427-405
NLRP6	Forward Primer	CCTACCAGTTCATCGACCAGA	21	60.6	1481-1501
	Reverse Primer	CTCAGCAGTCCGAAGAGGAA	20	61	1655-1636
